20 **Abstract:** Individuals vary substantially in their response to an acute stressor. Identifying the  
21 factors contributing to these individual differences in stress reactivity is of particular interest  
22 but still remains largely unknown in the stress and resilience domain. The present study aimed  
23 to investigate whether and how brain reactivity to negative stimuli during a non-stressful state  
24 could predict autonomic and neuroendocrine stress responses to an acute psychosocial  
25 stressor in healthy adults. To address this issue, fifty-two healthy young adults were recruited  
26 to view negative or neutral pictures while their electroencephalogram was recorded during a  
27 non-stressful state on the first experimental day. On the second experimental day, their  
28 autonomic and neuroendocrine responses to the Trier Social Stress Test (TSST) were  
29 measured. Results showed that increased late positive potential (LPP) to negative relative to  
30 neutral pictures was significantly associated with higher heart rate response but not with the  
31 cortisol response to acute social stress. These results implicate greater neural reactivity to  
32 negative stimuli as a physiological marker of heightened acute autonomic responses. These  
33 findings may help identify individuals who are at increased risk of developing negative  
34 outcomes under stress.

35  
36 **Keywords:** ERP, Late positive potential, Negative emotion, Acute stress, Heart rate, Cortisol

37

38 **1. Introduction**

39 We all experience stressors in our daily life. Physiologically, there are two inter-related  
40 and separated stress response systems, i.e., the autonomic nervous system (ANS) and the  
41 hypothalamic-pituitary-adrenocortical (HPA) axis. The ANS provides fast responses to acute  
42 stressors, leading to a rapid increase in heart rate (HR), whereas the HPA axis shows a  
43 relatively slower response with an elevated circulating glucocorticoid (cortisol in humans)  
44 level, peaking 10~20 minutes after stressor onset. These two interacting physiological  
45 systems on the one hand mobilize and reallocate resources aiming at helping individuals to  
46 cope with environmental threats and restore homeostasis, and on the other hand temporarily  
47 suppress activities that are not essential to survival (de Kloet et al., 2005; Lupien et al., 2009;  
48 Ulrich-Lai & Herman, 2009).

49 Interestingly, one characteristic of our responses to acute stressors is its large variability  
50 across individuals, especially for psychological stressors (for a review, see Lupien et al.,  
51 2007). Moreover, prior studies have suggested that exaggerated stress responses may decrease  
52 cognitive ability and increase emotional sensitivity, which in turn lead to mental problems (de  
53 Kloet et al., 2005; Lupien et al., 2009). Therefore, understanding this individual variability  
54 can enable us to identify vulnerability to stress-related problems and further prevent  
55 maladaptive consequences of stress.

56 The ANS and HPA responses to acute stressors are initiated and regulated by relatively  
57 hard-wired neural circuits in the brain (Ulrich-Lai & Herman, 2009). Especially, the amygdala  
58 plays an important role in the up-regulation of physiological stress responses, and the  
59 prefrontal cortex and hippocampus, where glucocorticoid receptors are abundantly expressed,  
60 are involved in the negative feedback regulation of cortisol response (McEwen, 2004).  
61 Crucially, these physiological responses are primarily driven by subjective explanation: once  
62 a situation is interpreted to be (potentially) threatening to the subjective wellbeing, the stress  
63 response is triggered to deal with it. What lies at the root of the physiological stress responses  
64 is the information processing in the stress-related neural circuits (Ulrich-Lai & Herman, 2009).  
65 Thus, quantifying neurocognitive activity in the stress-related neural circuits may shed light

66 on our understanding of individual differences in stress responses.

67 Neurocognitive processing of negative emotional information can be a promising factor  
68 influencing acute stress reactivity. The amygdala plays a central role in the processing of  
69 emotional information including threat detection and appraisal and facilitated attention to  
70 salient stimuli (Cunningham & Kirkland, 2014; Gupta, 2019; Murray, 2007; Sergerie et al.,  
71 2008; Vuilleumier, 2005). Meanwhile, interacting with the hippocampus and medial  
72 prefrontal cortex, the amygdala is a key brain region for stress regulation (Ulrich-Lai &  
73 Herman, 2009). In fMRI studies, amygdala activity, reflected indirectly by blood oxygen  
74 level-dependent (BOLD) fMRI signal, has been widely confirmed with increased response to  
75 negative information, and therefore used to index neural reactivity to emotional stimuli  
76 (Cunningham & Kirkland, 2014; McLaughlin et al., 2014; Sergerie et al., 2008; Swartz et al.,  
77 2015). With event-related potentials (ERPs), which has high temporal resolution, researchers  
78 have identified a sustained positive component reflecting sustained attention towards and  
79 elaborative processing of emotionally/motivationally salient information, the late positive  
80 potential (LPP). The LPP begins at approximately 300 ms after stimulus onset and sustains  
81 until stimulus offset with a broad posterior-superior scalp distribution (Cuthbert et al., 2000;  
82 Schupp et al., 2000; for a review see Hajcak et al., 2010). Prior studies of source analysis  
83 (Keil et al., 2002) and simultaneous fMRI and EEG recordings (De Rover et al., 2012; Liu et  
84 al., 2012; Sabatinelli et al., 2007) revealed that neural substrate of the LPP involves cortical  
85 and subcortical brain regions including the prefrontal cortex and amygdala.

86 Increased brain reactivity to negative emotional information may predict exaggerated  
87 stress responses considering the up-regulating role of the amygdala in stress response.  
88 Emerging evidence showed that relatively exaggerated amygdala reactivity towards negative  
89 stimuli predicted more posttraumatic stress symptoms in response to a terrorist attack  
90 (McLaughlin et al., 2014) and more behavioral and psychological symptoms in response to  
91 highly stressful events in combat (Admon et al., 2009) and in common civilian life (Swartz et  
92 al., 2015). Similarly, increased LPP amplitude for negative relative to neutral pictures was  
93 correlated with more posttraumatic stress symptoms due to traumatic life events (Lobo et al.,

94 2014). These findings suggest that pre-trauma individual differences in neural reactivity to  
95 negative stimuli are predictive for the risk to develop stress-related mental disorders after  
96 traumatic stressor exposure. Meanwhile, impairments of the physiological stress system are  
97 implicated in stress-related psychiatric symptoms/disorders (for reviews, see Pitman et al.,  
98 2012; Sherin & Nemeroff, 2011). Crucially, the link between stress and emotion  
99 processing-related neural circuit (e.g., prefrontal cortex, amygdala) is bidirectional; the neural  
100 circuit not only is impaired by stress but also plays an important role in regulating the stress  
101 response. So far, only one study demonstrated that reduced emotion regulation ability  
102 revealed as decreased prefrontal cortex activation during emotional incongruent trials  
103 predicted enhanced responses to acute social stress in cortisol and  $\alpha$ -amylase (Kaldewaij et  
104 al., 2019).

105 Therefore, the present study aimed to examine whether and how neurocognitive  
106 processing of emotionally negative information, i.e., the emotion processing-related LPP  
107 component, could predict physiological response to an acute psychosocial stressor in a  
108 healthy population. Participants were instructed to passively view negative and neutral  
109 pictures in a non-stressful state with their EEG recorded. Afterwards, participants returned to  
110 complete a laboratory-induced psychosocial acute stress task (the Trier Social Stress Test,  
111 TSST; Kirschbaum et al., 1993) while their ANS (heart rate) and HPA (cortisol) responses  
112 were monitored. According to previous findings, we hypothesized that individuals with  
113 enhanced neural activity as indicated by larger LPP amplitudes to negative stimuli would  
114 show stronger autonomic and/or neuroendocrine responses to an acute stress response.

115

## 116 2. **Methods**

### 117 2.1 *Participants*

118 Fifty-two healthy young adults (19 females and 33 males) with the age ranged from 18 to 25  
119 years ( $M = 22.5$ ,  $SD = 1.6$ ) were recruited to participate in the present study. Considering  
120 potential influences on stress responses, all participants were pre-screened and excluded

121 according to the following criteria: major chronic physiological disease or endocrine disorder;  
122 history of psychiatric or neurological disorders; symptoms of chronic anxiety, depression or  
123 insomnia; chronic use of psychiatric, neurological, or endocrine medicine; chronic overnight  
124 work or irregular day/night patterns; any medication use within three days before  
125 participating in the study; current periodontitis; excessive consumption of alcohol (more than  
126 two alcoholic drinks a day) or nicotine (more than five cigarettes a day). For females, we  
127 included those who did not take oral contraceptives during recruitment by telephone screen  
128 and invited them to participate in the experiment before or after their ovulation period (which  
129 is defined as the 12th to 16th days prior to the first day of the next menstrual cycle), in order  
130 to control the potential influence of sex hormone on stress responses (Kirschbaum et al.,  
131 1999; Kudielka & Kirschbaum, 2005). All participants had normal or corrected-to-normal  
132 vision and were right-handed by self-report. All participants gave written informed consent at  
133 the beginning of the experiment and got monetary compensation for their participation. This  
134 experiment was approved by the Ethics Committee of Human Experimentation at the Institute  
135 of Psychology, Chinese Academy of Sciences.

136

### 137 *2.2 General procedure*

138 Participants completed two experimental sessions within two weeks (the interval between the  
139 first and second session was within 6 days, except for one participant with a 13-day delay).  
140 For the first session, participants completed the passive viewing task with their EEG  
141 continuously recorded. For the second session, participants returned to our lab to complete the  
142 TSST while their stress responses were monitored. The TSST was implemented between 1:00  
143 pm to 5:00 pm to avoid the circadian fluctuation of cortisol levels (Dickerson and Kemeny,  
144 2004; Kudielka et al., 2004) and heart rates (e.g., Vandewalle et al., 2007). Upon arrival,  
145 participants were instructed to rest in a quiet room for 30 min during which they filled in  
146 questionnaires. After the rest period, participants provided the first salivary sample for a  
147 baseline measurement. Thereafter, participants completed the TSST task for stress induction,  
148 during which heart rate was continuously recorded. Salivary samples were provided at 0 min

149 (post-TSST 1), 20 min (post-TSST 2), 45 min (post-TSST 3), and 60 min (post-TSST 4) after  
150 the end of the TSST task.

151

### 152 *2.3 Stimulus Materials*

153 A total of 60 pictures were selected from the International Affective Picture System (IAPS;  
154 Lang et al., 1999), of which 30 were negative, depicting unpleasant scenes (e.g., threat and  
155 mutilation), and 30 were neutral, depicting neutral scenes (e.g., household objects, leaves,  
156 trees).<sup>1</sup> The negative and neutral pictures differed significantly on normative ratings of  
157 valence (negative:  $M = 2.48$ ,  $SD = 0.57$ ; neutral:  $M = 5.03$ ,  $SD = 0.34$ ;  $t(58) = -21.112$ ,  $p$   
158  $< .001$ ), arousal (negative:  $M = 5.66$ ,  $SD = 0.54$ ; neutral:  $M = 2.92$ ,  $SD = 0.49$ ;  $t(58) = 20.479$ ,  
159  $p < .001$ ), and dominance (negative:  $M = 3.77$ ,  $SD = 0.60$ ; neutral:  $M = 6.02$ ,  $SD = 0.36$ ;  $t(58)$   
160  $= -17.455$ ,  $p < .001$ ).

161

### 162 *2.4 Passive viewing task*

163 After an initial practice block, three experimental blocks were completed with 1-2 min breaks  
164 between the blocks. The 60 pictures were presented only once in a random order in each  
165 experimental block. Each picture was displayed for 1000 ms in full screen on a 17-in.  
166 (43.18-cm) monitor, occupying about 27.3° of horizontal visual angle and about 21.8° of  
167 vertical visual angle with a viewing distance of approximately 70 cm. The inter-trial interval  
168 varied randomly between 1200 and 1800 ms, during which a white cross was presented in the  
169 centre of a black background (Hot et al., 2006). Participants were instructed to watch the  
170 pictures attentively.

171

### 172 *2.5 EEG recording and preprocessing*

173 During the passive viewing task, the EEG was recorded from 64 scalp sites using Ag/AgCl

---

<sup>1</sup> The numbers of the IAPS pictures used were the following: negative (1111, 1275, 2751, 3015, 3051, 3062, 3064, 3102, 3130, 3160, 3550, 6244, 6530, 6834, 9007, 9120, 9180, 9253, 9400, 9405, 9415, 9430, 9432, 9433, 9500, 9520, 9530, 9592, 9611, and 9920) and neutral (2214, 2215, 2372, 2381, 2383, 2440, 2480, 2495, 2514, 2516, 2580, 2749, 2850, 2870, 2880, 5520, 5530, 5740, 6150, 7004, 7006, 7031, 7034, 7060, 7090, 7185, 7187, 7205, 7234, and 7950).

174 electrodes, which were placed according to the international 10–20 system and mounted in an  
175 elastic cap (Neuroscan Inc., Charlotte, North Carolina, USA). An on-line reference to the left  
176 mastoid and an off-line algebraic re-reference to the average of left and right mastoids were  
177 adopted. A pair of electrodes was placed above and below the left eye to record the vertical  
178 electrooculogram (VEOG). A pair of electrodes was placed 10 mm from the outer canthi of  
179 each eye to record the horizontal electrooculogram (HEOG). All inter-electrode impedance  
180 was kept below 5 k $\Omega$ . Signals were amplified and bandpass filtered from 0.05 to 100 Hz. Data  
181 were digitized at 1000 Hz.

182 The EEG data were processed using Scan 4.3 software (Neuroscan, USA). Eye-movement  
183 artifacts were corrected from the EEG data using a regression procedure implemented in the  
184 Neuroscan software (Semlitsch et al., 1986). Data were digitally low-pass filtered with 30 Hz  
185 and were epoched into periods of 1400 ms (including 400 ms pre-stimulus time as baseline)  
186 time-locked to the onset of the emotional pictures. Trials with artifacts exceeding  $\pm 100 \mu\text{V}$   
187 were rejected from analysis.

188

## 189 *2.6 Stress induction*

190 The TSSST task has been shown to be effective in eliciting stress responses (Buchanan et  
191 al., 2012, 2009). The task was consisted of a 5-min preparation, a 5-min speech, and a 5-min  
192 mental arithmetic. In the preparation period, participants were seated in laboratory room A  
193 and instructed to prepare a speech for an imagined scenario in which they were accused of  
194 shoplifting and they had to defend themselves in front of the store managers. They were also  
195 informed that their performance would be videotaped and evaluated. After preparation,  
196 participants were escorted to laboratory room B, where three experimenters (two females) in  
197 white coats pretending to be managers were presented. After the speech, participants were  
198 asked to complete a mental arithmetic task, which was to subtract serially the number 13  
199 starting at 1022 as fast and accurate as possible. Once an error was made, participants had to  
200 restart at 1022. Throughout the speech and arithmetic task, participants spoke into a  
201 microphone and a video camera in front of the three experimenters. The experimenters



202 communicated with the participant in a neutral manner with a neutral expression and provided  
203 no facial or verbal feedback.

204

### 205 *2.7 Measurement of acute stress response*

206 A wireless chest heart rate transmitter and a wrist monitor recorder (Polar RSC800CX,  
207 Polar Electro, Finland) was used for heart rate recording. The heart rate was recorded for 5  
208 min at baseline, continuously recorded for 15 min throughout the TSST task, and recorded for  
209 3 min each for the four post-stress measurements at 0 min, 20 min, 45 min, and 60 min after  
210 the end of the TSST (i.e., post-TSST 1-4). Averaged heart rate across each recording period  
211 was obtained from the Polar performance software and was defined as the number of beats  
212 per minutes (bpm).

213 Salivette collection tubes (Sarstedt, Rommelsdorf, Germany) were used to collect saliva  
214 samples for salivary cortisol levels at baseline and at 0 min (post-TSST 1), 20 min  
215 (post-TSST 2), 45 min (post-TSST 3), and 60 min (post-TSST 4) after the end of the TSST.  
216 Saliva samples were frozen at -22 °C immediately after collection until analysis and was  
217 thawed and centrifuged at 3000 rpm for 5 minutes before analysis. Cortisol concentration was  
218 determined by use of a commercial electrochemiluminescence immunoassay (Cobas e 601,  
219 Roche Diagnostics, Numbrecht, Germany) with the lower sensitivity being 0.5 nmol/l. Three  
220 cortisol values were missing due to insufficient saliva and imputed by combining the group  
221 mean and standard deviation for the missing cortisol sample at that time point, and the mean  
222 of the available cortisol samples of the participant (Booij et al., 2013).

223

### 224 *2.8 Questionnaires*

225 Trait anxiety was measured with the Chinese version of the trait subscale of the State-Trait  
226 Anxiety Inventory which showed good reliability and validity (STAI-T; Shek, 1993;  
227 Spielberger, 1983; Zhang et al., 2012). The STAI-T consists of 20 items with each rated on a  
228 four-point Likert scale, with a range of score from 20 to 80. Personality was assessed by the  
229 Big Five Personality Scale which included neuroticism, extraversion, openness to experience,

230 agreeableness, and conscientiousness (Donnellan et al., 2006; Zhang et al., 2012). The Big  
231 Five Personality Scale consists of 20 statements (4 for each personality dimension) rated on a  
232 five-point Likert scale, giving a range of 4–20 for each personality dimension.

233

### 234 *2.9 Data analysis*

235 For each participant, ERP waveforms were averaged for the negative and neutral pictures  
236 separately. The LPP was defined as the mean amplitude in the time window of 400-800 ms at  
237 the parietal region (P1, Pz, and P2) where the overall LPP modulation was largest based on  
238 visual inspection of the grand average ERPs (see figure 1). To increase stability of the data,  
239 the mean LPP amplitude was calculated by averaging the LPP amplitude across the P1, Pz,  
240 and P2 electrodes. To validate the valence effect on the LPP amplitude, a one-way  
241 repeated-measures ANOVA with valence (negative vs. neutral) as within-subjects factor was  
242 performed. Then, the LPP difference waves ( $\Delta$ LPP) was calculated by subtracting neutral  
243 from negative LPPs to serve as an ERP index of emotional processing.

244 For the stress response, a one-way repeated-measures ANOVA was performed on HR with  
245 Time as within-subject factor (baseline, during-TSST, post-TSST 1, post-TSST 2, post-TSST  
246 3, and post-TSST 4). Then, heart rate increase ratio ( $\Delta$ HR-ratio) was calculated by dividing  
247 the difference between the baseline HR and HR during the TSST task by the baseline HR to  
248 index autonomic stress response for each participant.

249 For the cortisol response to stress, a one-way repeated-measures ANOVA was conducted  
250 for salivary cortisol with Time as within-subject factor (baseline, post-TSST 1, post-TSST 2,  
251 post-TSST 3, and post-TSST 4). Then, cortisol increase ratio ( $\Delta$ Cort-ratio) was calculated by  
252 dividing the difference between baseline cortisol levels and the peak value (which was the  
253 cortisol level measured at 20 min after the end of TSST (post-TSST 2)) by the baseline  
254 cortisol to index HPA-axis stress response for each participant.

255 Bivariate correlations between  $\Delta$ LPP amplitude and the stress response measures  
256 ( $\Delta$ HR-ratio and  $\Delta$ Cort-ratio) were first calculated. Hierarchical regression analyses were then

257 conducted to investigate the predicting value of the  $\Delta$ LPP amplitude on the stress response.  
258 Two separate hierarchical regression analyses were conducted for the autonomic ( $\Delta$ HHR-ratio)  
259 and the endocrine stress response ( $\Delta$ Cort-ratio) as dependent variables, respectively. In the  
260 regression models, control variables including age, sex, years of education, neuroticism, and  
261 trait-anxiety which might influence stress response (Egloff et al., 2002; Fox et al., 2010;  
262 Kudielka et al., 2009; Wu et al., 2017) were entered in Step 1. Subsequently, the  $\Delta$ LPP  
263 amplitude was entered as predictor in Step 2.

264 Statistical analyses were performed in SPSS 18.0. Greenhouse-Geisser correction was  
265 used when sphericity was violated. Partial  $\eta^2$  was reported as a measure of effect size where  
266 appropriate. Post hoc comparisons were conducted using Bonferroni correction to obtain  
267 adjusted  $p$ -values. All reported  $p$ -values were two-tailed, and the level of significance was set  
268 at .05.

269

### 270 3. Results

#### 271 3.1 ERP data

272 The ERP waveforms time-locked to the negative and neutral picture onset and the  
273 difference wave (negative minus neutral) are shown in Figure 1. Negative pictures elicited  
274 larger LPP amplitudes as compared to neutral pictures ( $F(1,51) = 97.274, p < .001$ , partial  $\eta^2$   
275 = .652). The mean amplitude ( $\pm$  SD) of  $\Delta$ LPP was  $2.87 (\pm 2.12) \mu\text{V}$ .

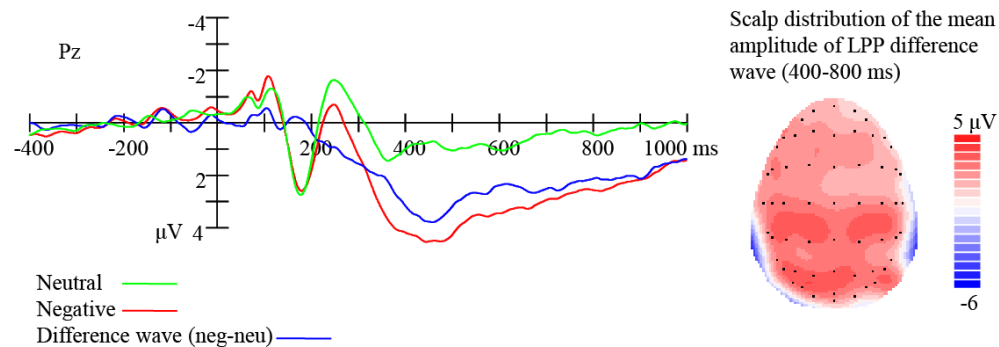

276

277 Figure 1: Left: The ERP waveforms time-locked to the negative and neutral picture onset and  
278 the difference (negative minus neutral) wave at Pz. Time 0 represents picture onset. Right:

279 The scalp distribution of  $\Delta$ LPP mean amplitude.

280

### 281 3.2 Stress responses

282 The means and standard deviation of HR and salivary cortisol levels measured before,

283 during, and after the TSST are depicted in Figure 2.

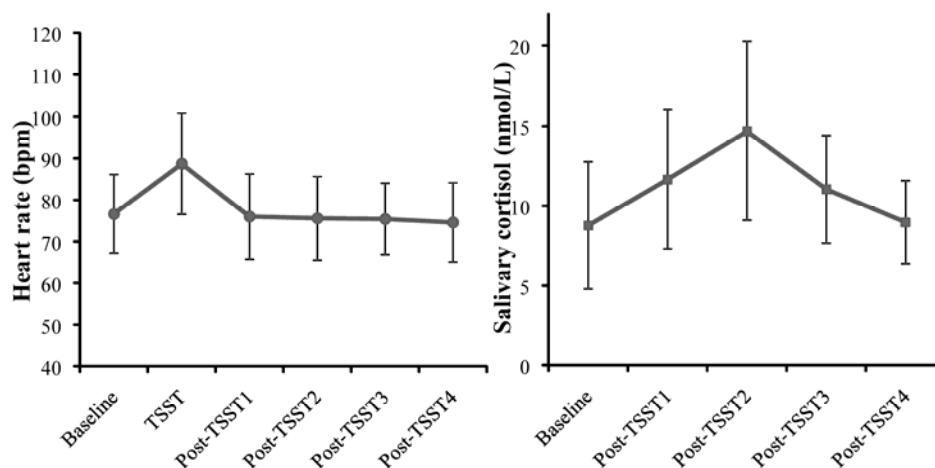

284

285

286 Figure 2: Mean values and standard deviation of heart rate (left) and salivary cortisol level (right)

287 measured before, during, and after the TSST task. Baseline: measured after 30-min rest; TSST:

288 measured during the TSST task; Post-TSST 1 to 4: measured at 0 min, 20 min, 45 min, and 60 min

289 after the end of the TSST task. Error bars are SD.

290

291 For the HR, the repeated-measures ANOVA revealed a significant main effect of Time

292 ( $F(5, 255) = 64.575, p < .001, \text{partial } \eta^2 = .559$ ). Post hoc analysis indicated significantly

293 higher HR during the TSST task compared to the baseline and post TSST measures ( $p_s$

294  $< .001$ ). The differences between the baseline HR and the four post-TSST measures were not

295 significant ( $p_s > .05$ ). The mean value ( $\pm$  SD) of the  $\Delta$ HR-ratio was  $0.16 (\pm 0.12)$ .

296 For the cortisol response, the repeated-measures ANOVA also revealed a significant main

297 effect of Time ( $F(4, 204) = 38.463, p < .001, \text{partial } \eta^2 = .430$ ). Post hoc analysis showed that

298 salivary cortisol levels measured at 0 min, 20 min, and 45 min after the end of the TSST were

299 significantly higher than cortisol levels measured at baseline and higher than 60 min after the

300 end of the TSST ( $p_s < .01$ ). There was no significant difference between cortisol levels at  
301 baseline and that measured at 60 min after the end of the TSST ( $p > .05$ ). The cortisol level  
302 reached peak at 20 min after the end of the TSST task which was higher than cortisol at 0 min  
303 and 45 min after the end of the TSST task ( $p_s < .001$ ). The mean value ( $\pm$  SD) of  $\Delta$ Cort-ratio  
304 was 0.82 ( $\pm$  0.86).

305

### 306 3.3 Prediction of stress responses by emotional ERP measure

307 Pearson correlation analysis showed that the  $\Delta$ LPP amplitude was positively correlated  
308 with  $\Delta$ HR-ratio ( $r = 0.280$ ,  $p < .05$ , Figure 3), but not with  $\Delta$ Cort-ratio ( $r = 0.161$ ,  $p = 0.253$ ).

309

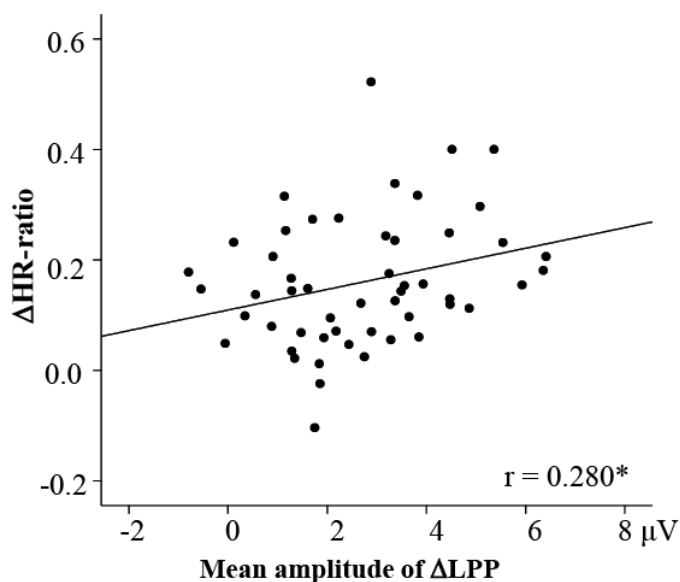

310

311 Figure 3: Scatter plot of the bivariate correlation between the  $\Delta$ LPP amplitude and the heart rate  
312 response to acute psychosocial stress ( $\Delta$ HR-ratio) ( $n = 52$ ). The mean amplitude of  $\Delta$ LPP  
313 calculated as the mean amplitude of the negative minus neutral trials. The heart rate stress  
314 response ( $\Delta$ HR-ratio) was calculated as the difference between the baseline HR and HR during the  
315 TSST task divided by baseline value. \*:  $p < .05$ .

316

317 Table1 shows the results of the hierarchical regression analysis for the HR response to stress with  
318 the  $\Delta$ LPP amplitude being predictor and  $\Delta$ HR-ratio being outcome. Model 2 explained a

319 significant amount of the variance in the HR response to the acute psychosocial stressor  
320 ( $\Delta$ HR-ratio). The amplitude of  $\Delta$ LPP was a significant predictor after controlling for age, sex,  
321 years of education, neuroticism, and trait-anxiety. In contrast, the hierarchical regression model for  
322 the cortisol response to stress ( $\Delta$ Cort-ratio) was not significant and the amplitude of  $\Delta$ LPP could  
323 not predict the  $\Delta$ Cort-ratio ( $p > 0.10$ ).

324 Table 1

325 Hierarchical regression analyses predicting HR response to the stressor.

| Predictors             | $\beta$ | t    | R2    | $\Delta$ R2 |
|------------------------|---------|------|-------|-------------|
| Model 1                |         |      | 0.134 |             |
| Model 2                |         |      | 0.230 | 0.096*      |
| Sex                    | 0.121   | 0.9  |       |             |
| Age                    | 0.205   | 1.6  |       |             |
| Neuroticism            | -0.107  | <1   |       |             |
| Trait Anxiety          | -0.268  | -1.7 |       |             |
| $\Delta$ LPP amplitude | 0.313   | 2.4* |       |             |

326 Note: The outcome measure was the  $\Delta$ HR-ratio during the TSST task (the difference between the  
327 baseline HR and HR during the TSST task divided by the baseline HR).  $\Delta$ LPP amplitude was the  
328 averaged amplitude of LPP towards negative relative to neutral pictures at the parietal region (P1,  
329 Pz, and P2). Sex, age, neuroticism, and trait-anxiety were included in Model 1 and the  $\Delta$ LPP  
330 amplitude was further included in Model 2. \*:  $p < .05$ .

331

#### 332 4. Discussion

333 The present study aimed at investigating the relationship between neurocognitive measure  
334 of emotional processing (i.e., LPP) and physiological responses to acute stress. The results  
335 showed that negative pictures elicited larger LPP amplitudes as compared with neutral  
336 pictures, and the TSST successfully induced acute ANS and HPA responses (as reflected by  
337 increased HR and cortisol, respectively). More importantly, increased LPP amplitudes  
338 towards negative relative to neutral stimuli during the non-stressful state significantly  
339 predicted HR response but not cortisol response to acute psychosocial stress (i.e., the TSST).

340 We found that enhanced LPP amplitudes to negative compared to neutral pictures in a  
341 non-stressful state were associated with higher HR responses to acute psychosocial stress. The  
342 LPP has been proposed to indicate sustained attention towards and elaborative processing of  
343 motivationally or emotionally salient stimuli (Cuthbert et al. 2000; Schupp et al. 2000; also see  
344 Hajcak et al. 2010 for review). Autonomic stress response (i.e., HR response) has been  
345 suggested to launch fast fight/flight reaction and initial effort to cope with stressors, yet  
346 enhanced response be related to increased health risks such as hypertension, coronary heart  
347 disease, diabetes (Egloff et al., 2002; Peters et al., 1998). The current finding showed that  
348 individuals who tend to engage more attention to process negative information would also  
349 recruit the autonomic system to a higher degree in order to deal with a stressful situation,  
350 which in the long-run might increase the risks to develop stress-related health problems.

351 The positive correlation we found can be explained in three ways. First, with a  
352 prospective design, it adds to the evidence that negative processing bias plays a causal role in  
353 stress vulnerability (e.g., Fox et al., 2010). For example, prior fMRI and EPR studies found  
354 that relatively exaggerated amygdala reactivity and increased LPP amplitude towards negative  
355 stimuli before trauma exposure were predictive to posttraumatic symptoms in response to  
356 traumatic stressors (Admon et al., 2009; Lobo et al., 2014; McLaughlin et al., 2014; Swartz et  
357 al., 2015). Egloff and colleagues (2002) found that attentional bias to negative stimuli  
358 measured by response times positively predicted HR and blood pressure responses to an  
359 evaluated speech task in females. Characterized by paying more attention to negative  
360 environmental cues, individuals may interpret the stressor in a more negative way and in turn  
361 be more stressed in the TSST task, as reflected in a higher autonomic response. Second,  
362 although only negative pictures were used in our experiment, the LPP can be elicited by  
363 arousing stimuli regardless of its valence (Cuthbert et al., 2000; Hajcak et al., 2010; Schupp et  
364 al., 2000). Therefore, it is possible that more sustained attentional engagement with  
365 emotionally arousing information rather than biased processing of negatively valence  
366 information per se may have led to a higher arousal response in the stressful situation,  
367 revealed as an exaggerated heart rate increase. In line with this explanation, literature has

368 shown that attentional bias towards both angry and happy faces was predictive to PTSD  
369 symptoms (Schäfer et al., 2016).

370 Since our findings are correlational in nature, a third possible explanation is common  
371 underlying neural mechanisms of emotional information processing and autonomic stress  
372 response. Prior studies using simultaneous fMRI and EEG recording (Liu et al., 2012;  
373 Sabatinelli et al. 2007; 2013), genetic analysis, and pharmacological manipulation (de Rover  
374 et al., 2012) have suggested that the increased LPP amplitude reflects amygdala modulation,  
375 which plays an important role in autonomic stress response (e.g., Fortaleza et al., 2012). Thus,  
376 a generally hypersensitive amygdala may explain both high amplitude of LPP towards  
377 negative stimuli and high HR response to stress.

378 In contrast to the autonomic stress response, we found that attentional processing of  
379 negative stimuli was not a significant predictor of cortisol response to acute psychological  
380 stress. These results are consistent with previous behavioral studies, in which the negative  
381 attentional bias measured by reaction times was related to HR and blood pressure responses  
382 (Egloff et al., 2002) but not to cortisol response (Fox et al., 2010) to a TSST-liked public  
383 speech stressor. Previous literature showed that the ANS and HPA stress response systems to  
384 some degree have different regulating neural circuits. The central nucleus of the amygdala  
385 was suggested to preferentially regulate the autonomic stress response, whereas the medial  
386 and basolateral amygdala nuclei weight in more on HPA axis response modulation (for a  
387 review, see Ulrich-Lai and Herman, 2009). In emotional information processing, the central  
388 nucleus was found being prominent in attentional modulation on the visual system  
389 (Krolak-Salmon et al., 2004), which is also a neural source of the LPP (Liu et al., 2012;  
390 Sabatinelli et al., 2007; 2013). Future research should use imaging techniques with higher  
391 space-resolution (e.g., fMRI and MEG) to further explore the neural circuits of emotion  
392 processing in predicting physiological stress response.

393 Several limitations to the present study should be noted. First, only healthy young adults  
394 were recruited. It should be tested whether current finding can be generalized to other age  
395 groups. Second, we investigated females of normal menstrual cycles before and after their



396 ovulation period but did not measure gonadal hormones to determine their menstrual cycle  
397 stages. Future research can combine such objective measures to test whether current finding  
398 can be generalized to different menstrual cycle stages in female. Third, we only focused on  
399 negative emotional neurocognitive processing here. Future studies should address whether  
400 positive and negative emotional processing have different predictive power on stress  
401 responses. Last but not least, the passive viewing paradigm we used here is relatively simple  
402 and no behavioural data is reported. More studies with delicate experimental design should be  
403 applied to replicate the current findings. Nevertheless, it is worthwhile to mention that the  
404 LPPs in a free-viewing context in the absence of behavioural outputs could be utilized as a  
405 sensitive biomarker of emotion processing in clinical populations with impaired motor  
406 function, such as Alzheimer's disease and other neurological disorders.

407 To summarize, neural processing of negative emotional information reflected by the  
408 amplitude of LPP during non-stressful condition showed a positive correlation with HR  
409 response toward an acute psychological stressor among healthy young adults. The present  
410 findings indicate that the neural processing of negative emotional information can be used as  
411 a biomarker of individual autonomic stress reactivity.

412

413

414       **Reference**

- 415       Admon, R., Lubin, G., Stern, O., Rosenberg, K., Sela, L., Ben-Ami, H., Hendler, T., 2009.
- 416               Human vulnerability to stress depends on amygdala's predisposition and hippocampal
- 417               plasticity. *Proc. Natl. Acad. Sci.* 106(33), 14120-14125.
- 418               <https://doi.org/10.1073/pnas.0903183106>
- 419       Booij, S.H., Bouma, E.M.C., De Jonge, P., Ormel, J., Oldehinkel, A.J., 2013. Chronicity of
- 420               depressive problems and the cortisol response to psychosocial stress in adolescents:
- 421               The TRAILS study. *Psychoneuroendocrinology.* 38(5), 659-666.
- 422               <https://doi.org/10.1016/j.psyneuen.2012.08.004>
- 423       Buchanan, T.W., Bagley, S.L., Stansfield, R.B., Preston, S.D., 2012. The empathic,
- 424               physiological resonance of stress. *Soc. Neurosci.* 7(2), 191-201.
- 425               <https://doi.org/10.1080/17470919.2011.588723>
- 426       Buchanan, T.W., Tranel, D., Kirschbaum, C., 2009. Hippocampal damage abolishes the
- 427               cortisol response to psychosocial stress in humans. *Horm. Behav.* 56(1), 44-50.
- 428               <https://doi.org/10.1016/j.yhbeh.2009.02.011>
- 429       Cunningham, W.A., Kirkland, T., 2014. The joyful, yet balanced, amygdala: Moderated
- 430               responses to positive but not negative stimuli in trait happiness. *Soc. Cogn. Affect.*
- 431               *Neurosci.* 9(6), 760-766. <https://doi.org/10.1093/scan/nst045>
- 432       Cuthbert, B.N., Schupp, H.T., Bradley, M.M., Birbaumer, N., Lang, P.J., 2000. Brain
- 433               potentials in affective picture processing: Covariation with autonomic arousal and
- 434               affective report. *Biol. Psychol.* 52, 95-111.
- 435               [https://doi.org/10.1016/S0301-0511\(99\)00044-7](https://doi.org/10.1016/S0301-0511(99)00044-7)
- 436       de Kloet, E.R., Joëls, M., Holsboer, F., 2005. Stress and the brain: from adaptation to disease.
- 437               *Nat. Rev. Neurosci.* 6(6), 463-475. <https://doi.org/10.1038/nrn1683>
- 438       De Rover, M., Brown, S.B.R.E., Boot, N., Hajcak, G., Van Noorden, M.S., Van Der Wee,
- 439               N.J.A., Nieuwenhuis, S., 2012. Beta receptor-mediated modulation of the late positive
- 440               potential in humans. *Psychopharmacology (Berl).* 219(4), 971-979.

- 441 <https://doi.org/10.1007/s00213-011-2426-x>
- 442 Dickerson, S.S., Kemeny, M.E., 2004. Acute stressors and cortisol responses: A theoretical  
443 integration and synthesis of laboratory research. *Psychol. Bull.* 130(3), 355-391.  
444 <https://doi.org/10.1037/0033-2909.130.3.355>
- 445 Donnellan, M.B., Oswald, F.L., Baird, B.M., Lucas, R.E., 2006. The Mini-IPIP scales:  
446 Tiny-yet-effective measures of the Big Five factors of personality. *Psychol. Assess.*  
447 18(2), 192–203. <https://doi.org/10.1037/1040-3590.18.2.192>
- 448 Egloff, B., Wilhelm, F.H., Neubauer, D.H., Mauss, I.B., Gross, J.J., 2002. Implicit Anxiety  
449 Measure Predicts Cardiovascular Reactivity to an Evaluated Speaking Task. *Emotion.*  
450 2(1), 3-11. <https://doi.org/10.1037/1528-3542.2.1.3>
- 451 Fortaleza, E.A.T., Scopinho, A.A., Corrêa, F.M.A., 2012.  $\beta$ -Adrenoceptors in the medial  
452 amygdaloid nucleus modulate the tachycardiac response to restraint stress in rats.  
453 *Neuroscience.* 227, 170-179. <https://doi.org/10.1016/j.neuroscience.2012.09.048>
- 454 Fox, E., Cahill, S., Zougkou, K., 2010. Preconscious Processing Biases Predict Emotional  
455 Reactivity to Stress. *Biol. Psychiatry.* 67(4), 371-377.  
456 <https://doi.org/10.1016/j.biopsych.2009.11.018>
- 457 Gupta, R., 2019. Positive emotions have a unique capacity to capture attention. *Prog. Brain*  
458 *Res.* 247, 23–46. <https://doi.org/10.1016/BS.PBR.2019.02.001>
- 459 Hajcak, G., Macnamara, A., Olvet, D.M., 2010. Event-related potentials, emotion, and  
460 emotion regulation: An integrative review. *Dev. Neuropsychol.* 35(2), 129-155.  
461 <https://doi.org/10.1080/87565640903526504>
- 462 Hot, P., Saito, Y., Mandai, O., Kobayashi, T., Sequeira, H., 2006. An ERP investigation of  
463 emotional processing in European and Japanese individuals. *Brain Res.*  
464 <https://doi.org/10.1016/j.brainres.2006.09.020>
- 465 Kaldewaij, R., Koch, S., Zhang, W., Hashemi, M. M., Klumpers, F., Roelofs, K., 2019.  
466 Frontal Control Over Automatic Emotional Action Tendencies Predicts Acute Stress  
467 Responsivity. *Biological psychiatry. Cogn. Neurosci. Neuroimaging*, 4(11), 975–983.  
468 <https://doi.org/10.1016/j.bpsc.2019.06.011>

- 469 Keil, A., Bradley, M.M., Hauk, O., Rockstroh, B., Elbert, T., Lang, P.J., 2002. Large-scale  
470 neural correlates of affective picture processing. *Psychophysiology*. 39(5), 641-649.  
471 <https://doi.org/10.1017.S0048577202394162>
- 472 Kirschbaum, C., Kudielka, B.M., Gaab, J., Schommer, N.C., Hellhammer, D.H., 1999. Impact  
473 of gender, menstrual cycle phase, and oral contraceptives on the activity of the  
474 hypothalamus-pituitary-adrenal axis. *Psychosom. Med.* 61, 154-162.  
475 <https://doi.org/10.1097/00006842-199903000-00006>
- 476 Kirschbaum, C., Pirke, K.M., Hellhammer, D.H., 1993. The 'Trier Social Stress Test'--a tool  
477 for investigating psychobiological stress responses in a laboratory setting. 28(1-2),  
478 76-81. *Neuropsychobiology*. <https://doi.org/10.1159/000119004>
- 479 Krolak-Salmon, P., Hénaff, M.A., Vighetto, A., Bertrand, O., Mauguière, F., 2004. Early  
480 amygdala reaction to fear spreading in occipital, temporal, and frontal cortex: A depth  
481 electrode ERP study in human. *Neuron*. 42, 665-676.  
482 [https://doi.org/10.1016/S0896-6273\(04\)00264-8](https://doi.org/10.1016/S0896-6273(04)00264-8)
- 483 Kudielka, B.M., Buske-Kirschbaum, A., Hellhammer, D.H., Kirschbaum, C., 2004. HPA axis  
484 responses to laboratory psychosocial stress in healthy elderly adults, younger adults,  
485 and children: Impact of age and gender. *Psychoneuroendocrinology*. 29(1), 83-98.  
486 [https://doi.org/10.1016/S0306-4530\(02\)00146-4](https://doi.org/10.1016/S0306-4530(02)00146-4)
- 487 Kudielka, B.M., Hellhammer, D.H., Wüst, S., 2009. Why do we respond so differently?  
488 Reviewing determinants of human salivary cortisol responses to challenge.  
489 *Psychoneuroendocrinology*. 34, 2-18. <https://doi.org/10.1016/j.psyneuen.2008.10.004>
- 490 Kudielka, B.M., Kirschbaum, C., 2005. Sex differences in HPA axis responses to stress: a  
491 review. *Biol. Psychol.* 69(1), 113-132.  
492 <https://doi.org/10.1016/j.biopsycho.2004.11.009>
- 493 Liu, Y., Huang, H., McGinnis-Deweese, M., Keil, A., Ding, M., 2012. Neural Substrate of the  
494 Late Positive Potential in Emotional Processing. *J. Neurosci.* 32(42), 14563-14572.  
495 <https://doi.org/10.1523/jneurosci.3109-12.2012>

- 496 Lobo, I., David, I.A., Figueira, I., Campagnoli, R.R., Volchan, E., Pereira, M.G., de Oliveira,  
497 L., 2014. Brain reactivity to unpleasant stimuli is associated with severity of  
498 posttraumatic stress symptoms. *Biol. Psychol.* 103, 233-241.  
499 <https://doi.org/10.1016/j.biopsycho.2014.09.002>
- 500 Lupien, S.J., Maheu, F., Tu, M., Fiocco, A., Schramek, T.E., 2007. The effects of stress and  
501 stress hormones on human cognition: Implications for the field of brain and  
502 cognition. *Brain Cogn.* <https://doi.org/10.1016/j.bandc.2007.02.007>
- 503 Lupien, S.J., McEwen, B.S., Gunnar, M.R., Heim, C., 2009. Effects of stress throughout the  
504 lifespan on the brain, behaviour and cognition. *Nat. Rev. Neurosci.* 10(6), 434-445.  
505 <https://doi.org/10.1038/nrn2639>
- 506 McEwen, B.S., 2004. Protection and damage from acute and chronic stress: allostasis and  
507 allostatic overload and relevance to the pathophysiology of psychiatric disorders.  
508 *Ann. N. Y. Acad. Sci.* 1032, 1-7. <https://doi.org/10.1196/annals.1314.001>
- 509 McLaughlin, K.A., Busso, D.S., Duys, A., Green, J.G., Alves, S., Way, M., Sheridan, M.A.,  
510 2014. Amygdala response to negative stimuli predicts PTSD symptom onset following  
511 a terrorist attack. *Depress. Anxiety.* 31(10), 834-842. <https://doi.org/10.1002/da.22284>
- 512 Murray, E.A., 2007. The amygdala, reward and emotion. *Trends Cogn. Sci.* 11(11), 489-497.  
513 <https://doi.org/10.1016/j.tics.2007.08.013>
- 514 Peters, M.L., Godaert, G.L.R., Ballieux, R.E., Van Vliet, M., Willemsen, J.J., Sweep, F.C.G.J.,  
515 Heijnen, C.J., 1998. Cardiovascular and endocrine responses to experimental stress:  
516 Effects of mental effort and controllability. *Psychoneuroendocrinology.* 23, 1-17.  
517 [https://doi.org/10.1016/S0306-4530\(97\)00082-6](https://doi.org/10.1016/S0306-4530(97)00082-6)
- 518 Pitman, R. K., Rasmusson, A. M., Koenen, K. C., Shin, L. M., Orr, S. P., Gilbertson, M. W.,  
519 Milad, M. R., Liberzon, I., 2012. Biological studies of post-traumatic stress disorder.  
520 *Nat. Rev. Neuroscience,* 13(11), 769–787. <https://doi.org/10.1038/nrn3339>
- 521 Sabatinelli, D., Lang, P.J., Keil, A., Bradley, M.M., 2007. Emotional perception: Correlation  
522 of functional MRI and event-related potentials. *Cereb. Cortex.* 17, 1085–1091.  
523 <https://doi.org/10.1093/cercor/bhl017>

- 524 Schäfer, J., Bernstein, A., Zvielli, A., Höfler, M., Wittchen, H.U., Schönfeld, S., 2016.  
525 Attentional bias temporal dynamics predict posttraumatic stress symptoms: A  
526 prospective-longitudinal study among soldiers. *Depress. Anxiety*. 33(7), 630-639.  
527 <https://doi.org/10.1002/da.22526>
- 528 Schupp, H.T., Cuthbert, B.N., Bradley, M.M., Cacioppo, J.T., Tiffany, I., Lang, P.J., 2000.  
529 Affective picture processing: The late positive potential is modulated by motivational  
530 relevance. *Psychophysiology*. 37, 257–261.  
531 <https://doi.org/10.1017/S0048577200001530>
- 532 Semlitsch, H. V., Anderer, P., Schuster, P., Presslich, O., 1986. A Solution for Reliable and  
533 Valid Reduction of Ocular Artifacts, Applied to the P300 ERP. *Psychophysiology*.  
534 23,695–703. <https://doi.org/10.1111/j.1469-8986.1986.tb00696.x>
- 535 Sergerie, K., Chochol, C., Armony, J.L., 2008. The role of the amygdala in emotional  
536 processing: A quantitative meta-analysis of functional neuroimaging studies.  
537 *Neurosci. Biobehav. Rev.* 32(4), 811-830.  
538 <https://doi.org/10.1016/j.neubiorev.2007.12.002>
- 539 Shek, D.T.L., 1993. The Chinese version of the State-Trait Anxiety Inventory: Its  
540 relationship to different measures of psychological well-being. *J. Clin. Psychol.* 49,  
541 349-358.  
542 [https://doi.org/10.1002/1097-4679\(199305\)49:3<349::AID-JCLP2270490308>3.0.C](https://doi.org/10.1002/1097-4679(199305)49:3<349::AID-JCLP2270490308>3.0.CO;2-J)  
543 [O;2-J](https://doi.org/10.1002/1097-4679(199305)49:3<349::AID-JCLP2270490308>3.0.CO;2-J)
- 544 Sherin, J. E., Nemeroff, C. B., 2011. Post-traumatic stress disorder: the neurobiological  
545 impact of psychological trauma. *Dialogues Clin. Neurosci.* 13(3), 263–278.  
546 <https://doi.org/10.31887/DCNS.2011.13.2/jsherin>
- 547 Spielberger, C.D., 1983. Manual for the State-Trait Anxiety Inventory (STAI Form Y),  
548 Consulting Psychologists Palo Alto.  
549 <https://doi.org/10.1002/9780470479216.corpsy0943>
- 550 Swartz, J.R., Knodt, A.R., Radtke, S.R., Hariri, A.R., 2015. A neural biomarker of  
551 psychological vulnerability to future life stress. *Neuron*. 85(3), 505-511.

552 <https://doi.org/10.1016/j.neuron.2014.12.055>

553 Ulrich-Lai, Y.M., Herman, J.P., 2009. Neural regulation of endocrine and autonomic stress  
554 responses. *Nat. Rev. Neurosci.* 10(6), 397-409. <https://doi.org/10.1038/nrn2647>

555 Vandewalle, G., Middleton, B., Rajaratnam, S.M.W., Stone, B.M., Thorleifsdottir, B., Arendt,  
556 J., Dijk, D.J., 2007. Robust circadian rhythm in heart rate and its variability:  
557 Influence of exogenous melatonin and photoperiod. *J. Sleep Res.* 16(2), 148-155.  
558 <https://doi.org/10.1111/j.1365-2869.2007.00581.x>

559 Vuilleumier, P., 2005. How brains beware: Neural mechanisms of emotional attention. *Trends*  
560 *Cogn. Sci.* 9, 585–594 <https://doi.org/10.1016/j.tics.2005.10.011>

561 Wu, J., Sun, X., Wang, L., Zhang, L., Fernández, G., Yao, Z., 2017. Error consciousness  
562 predicts physiological response to an acute psychosocial stressor in men.  
563 *Psychoneuroendocrinology.* 83, 84-90.  
564 <https://doi.org/10.1016/j.psyneuen.2017.05.029>

565 Zhang, J.-F., Shi, Z.-B., Zhao, P.-L., Wang, L., 2012. Posttraumatic growth and related factors  
566 in junior middle school students after the Wenchuan earthquake. [Posttraumatic  
567 growth and related factors in junior middle school students after the Wenchuan  
568 earthquake.]. *Chinese Ment. Heal. J.* 26(5), 357–362.

569

570

571

572

573

574

575

576

577

578

579 **Acknowledgement**

580 This work was supported by the National Natural Science Foundation of China (31771246,

581 31530031), the State Scholarship Fund of China (201604910560), the Natural Science

582 Foundation of Shenzhen University (2019076), and Guangdong Innovative and

583 Entrepreneurial Research Team Program. We acknowledge Xiaofang Sun and Wenyu Li for

584 their help in data collection.



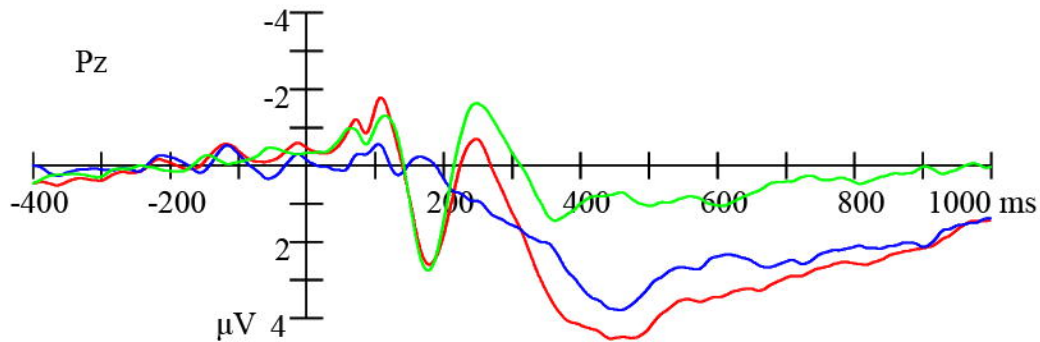

Neutral ———

Negative ———

Difference wave (neg-neu) ———

Scalp distribution of the mean amplitude of LPP difference wave (400-800 ms)

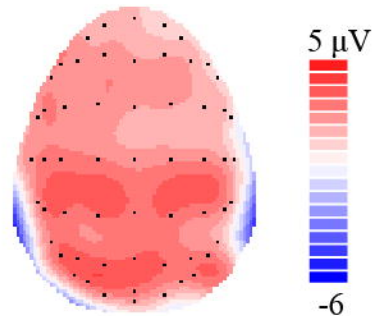

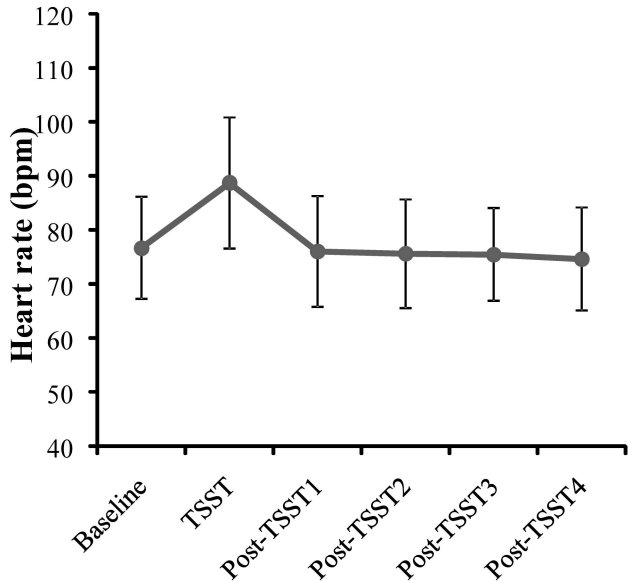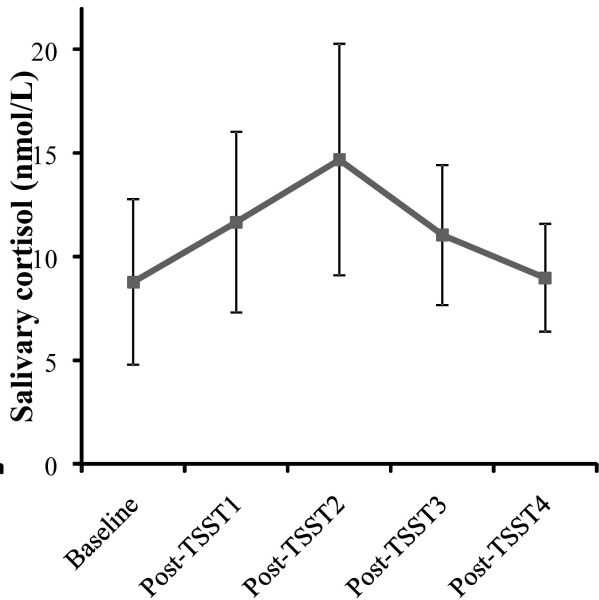

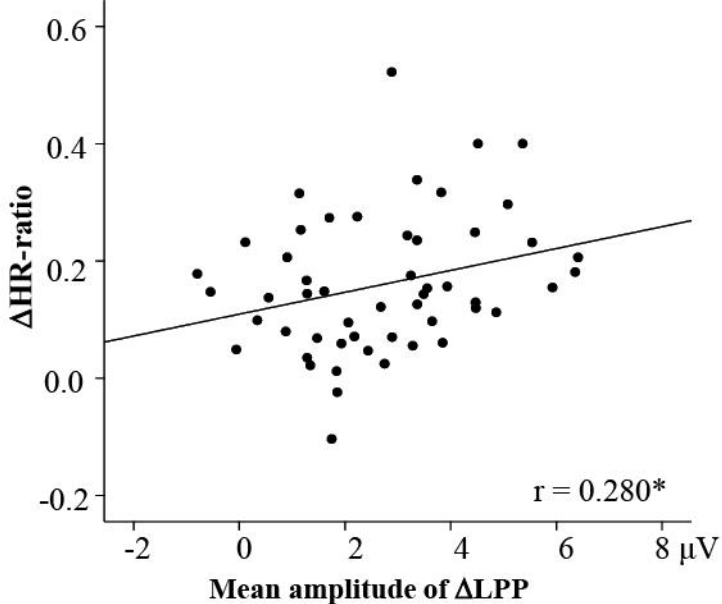

Source: https://www.medrxiv.org/content/10.1101/2021.05.18.21257390v1.full.pdf
